# Supplementary material
Source: PubMed Central journal article supplement (PMC1450153)

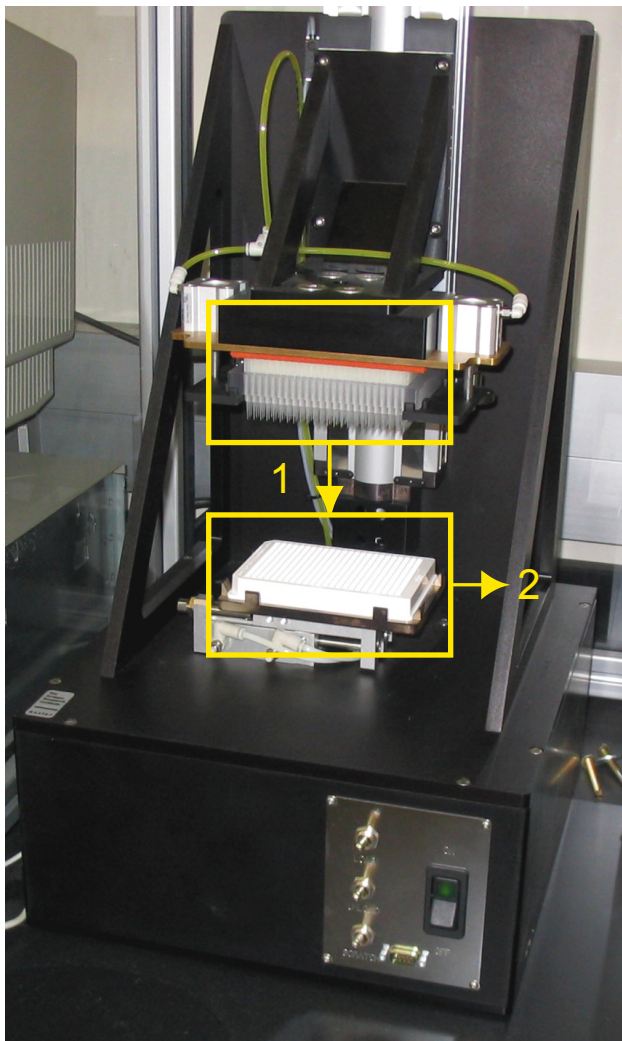

Supplement: pnas_0600040103_2.pdf [file pnas_0600040103_2.pdf]

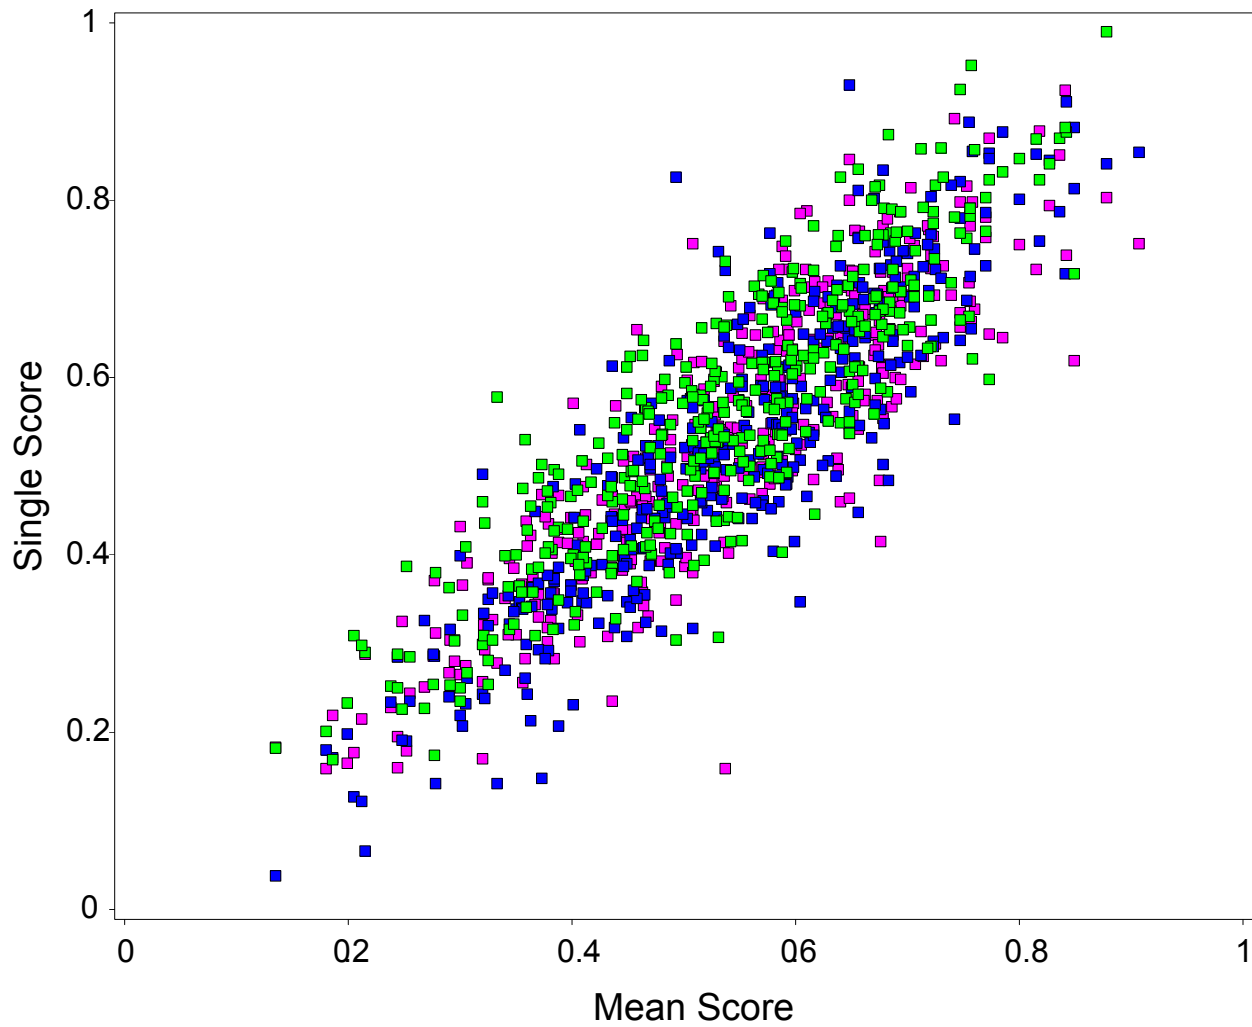

Supplement: pnas_0600040103_3.pdf [file pnas_0600040103_3.pdf]

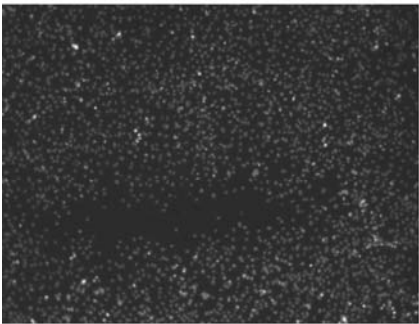

(a)

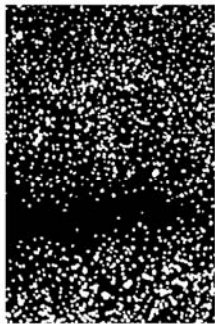

(b)

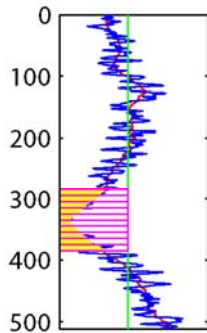

(c)

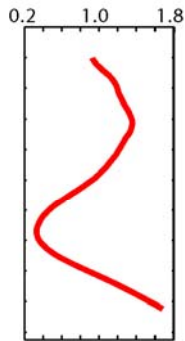

(d)

Supplement: pnas_0600040103_4.pdf [file pnas_0600040103_4.pdf]
